# Supplementary material for: Paternal Occupational Exposure to Heavy Metals and Welding Fumes and Testicular Germ Cell Tumours in Sons in France
Source: MDPI journal article supplement (doi:10.3390/cancers14194962), 2022-10-10
Supplement: s1 [file s1]

**Supplementary Table S1.** Spearman correlation coefficients (r) between paternal occupational exposure index (PxL values) of metals in fathers, TESTIS study, France (N= 1124).

|      | <b>Pb</b> | <b>Cd</b> | <b>Cr</b> | <b>Fe</b> | <b>Ni</b> | <b>WELD</b> |
|------|-----------|-----------|-----------|-----------|-----------|-------------|
| Pb   | 1         |           |           |           |           |             |
| Cd   | 0.20      | 1         |           |           |           |             |
| Cr   | 0.67      | 0.11      | 1         |           |           |             |
| Fe   | 0.62      | 0.11      | 0.91      | 1         |           |             |
| Ni   | 0.64      | 0.11      | 0.96      | 0.95      | 1         |             |
| WELD | 0.64      | 0.11      | 0.95      | 0.95      | 0.99      | 1           |

Pb: lead, Cd: cadmium, Cr: chromium, Fe: iron, Ni: nickel, WELD: welding fumes

**Supplementary Table S2.** Occurrence of multiple **concurrent** exposures to heavy metals, and welding fumes among exposed fathers in the TESTIS study, France.

| <b>Number of metal (s) exposure occurring concurrently</b> | <b>n=166</b> | <b>%</b> |
|------------------------------------------------------------|--------------|----------|
| 1                                                          | 48           | 28.9     |
| 2                                                          | 12           | 7.2      |
| 3                                                          | 29           | 17.5     |
| 4                                                          | 73           | 44.0     |
| 5                                                          | 4            | 2.4      |

**Supplementary Table S3:** Prevalence of paternal exposure to heavy metals and welding fumes at birth (N = 1124). Exposed if occupational exposure index (P × L) was > 0

| Presence of exposure     |                   | Cases |       | Controls |      | Total |      |
|--------------------------|-------------------|-------|-------|----------|------|-------|------|
| Occupational agent       | Exposure category | n     | %     | n        | %    | n     | %    |
| Metals                   |                   |       |       |          |      |       |      |
| At least one heavy metal | exposed           | 67    | 14.8  | 99       | 14.8 | 166   | 14.8 |
|                          | unexposed         | 363   | 80.0  | 548      | 81.8 | 911   | 81.1 |
|                          | missing           | 24    | 5.3   | 23       | 3.4  | 47    | 4.2  |
| Lead (µmol/l blood)      | exposed           | 56    | 12.33 | 71       | 10.6 | 127   | 11.3 |
|                          | unexposed         | 374   | 82.4  | 576      | 86.0 | 950   | 84.5 |
|                          | missing           | 24    | 5.3   | 23       | 4.4  | 47    | 4.2  |
| Cadmium (µg/m3)          | exposed           | 4     | 0.9   | 4        | 0.7  | 8     | 0.7  |
|                          | unexposed         | 426   | 93.8  | 643      | 96.0 | 1069  | 95.1 |
|                          | missing           | 24    | 5.3   | 23       | 3.4  | 47    | 4.2  |
| Chromium (µg/m3)         | exposed           | 45    | 9.9   | 68       | 10.2 | 113   | 10.1 |
|                          | unexposed         | 385   | 84.8  | 579      | 86.4 | 964   | 85.8 |
|                          | missing           | 24    | 5.3   | 23       | 3.4  | 47    | 4.2  |
| Iron (mg/m3)             | exposed           | 45    | 9.9   | 72       | 10.8 | 117   | 10.4 |
|                          | unexposed         | 385   | 84.8  | 575      | 85.8 | 960   | 85.4 |
|                          | missing           | 24    | 5.3   | 23       | 3.4  | 47    | 4.2  |
| Nickel (µg/m3)           | exposed           | 42    | 9.3   | 64       | 9.6  | 106   | 9.4  |
|                          | unexposed         | 388   | 85.5  | 583      | 87.0 | 971   | 86.4 |
|                          | missing           | 24    | 5.3   | 23       | 3.4  | 47    | 4.2  |
| Combustion products      |                   |       |       |          |      |       |      |
| Welding fumes (µg/m3)    | exposed           | 43    | 9.5   | 64       | 9.6  | 107   | 9.5  |
|                          | unexposed         | 387   | 85.3  | 583      | 87.0 | 970   | 86.3 |
|                          | missing           | 24    | 5.3   | 23       | 3.4  | 47    | 4.2  |

**Supplementary Table S4:** Odds ratios (ORs) and 95% confidence intervals (95% CI) for TGCT associated with paternal occupational exposure to a low and high occupational exposure index of specific agents from sensitivity analysis excluding cases with personal and/or family history of cryptorchidism (n=80), TESTIS study, France.

|                        |                                  | All controls (n=670) | All TGCT cases (n=448) * |                                    |                             |
|------------------------|----------------------------------|----------------------|--------------------------|------------------------------------|-----------------------------|
|                        |                                  | n (%)                | n (%)                    | adjusted ORs (95% CI) <sup>a</sup> | <i>P</i> trend <sup>†</sup> |
| Lead (μmol/l blood)    |                                  |                      |                          |                                    |                             |
|                        | Unexposed to lead [Ref]          | 576 (89.0)           | 369 (87.0)               |                                    |                             |
|                        | Ever exposed to lead             | 71 (11.0)            | 55 (13.0)                | 1.24 (0.83-1.84)                   |                             |
|                        | Low (< 18)                       | 45 (7.0)             | 39 (9.2)                 | 1.48 (0.92-2.36)                   |                             |
|                        | High (≥18)                       | 26 (4.0)             | 16 (3.8)                 | 0.84 (0.42-1.67)                   | 0.64                        |
| Chromium (μg/m-3)      |                                  |                      |                          |                                    |                             |
|                        | Unexposed to chromium [Ref]      | 579 (89.5)           | 381 (89.9)               |                                    |                             |
|                        | Ever exposed to chromium         | 68 (10.5)            | 43 (10.1)                | 0.89 (0.58-1.37)                   |                             |
|                        | Low (87)                         | 49 (7.6)             | 31 (7.3)                 | 0.85 (0.51-1.40)                   |                             |
|                        | High (≥87)                       | 19 (2.9)             | 12 (2.8)                 | 1.00 (0.48-2.12)                   | 0.72                        |
| Iron (mg/m-3)          |                                  |                      |                          |                                    |                             |
|                        | Unexposed to iron [Ref]          | 575 (88.9)           | 381 (89.9)               |                                    |                             |
|                        | Ever exposed to iron             | 72 (11.1)            | 43 (10.1)                | 0.88 (0.57-1.33)                   |                             |
|                        | Low (<27.05)                     | 60 (9.3)             | 34 (8.0)                 | 0.87 (0.53-1.41)                   |                             |
|                        | High (≥27.05)                    | 12 (1.9)             | 9 (2.1)                  | 1.18 (0.48-2.87)                   | 0.95                        |
| Nickel (μg/m-3)        |                                  |                      |                          |                                    |                             |
|                        | Unexposed to nickel [Ref]        | 583 (90.1)           | 384 (90.6)               |                                    |                             |
|                        | Ever exposed to nickel           | 64 (9.9)             | 40 (9.4)                 | 0.92 (0.60-1.43)                   |                             |
|                        | Low (<67.48)                     | 52 (8.0)             | 31 (7.3)                 | 0.87 (0.53-1.41)                   |                             |
|                        | High (≥67.48)                    | 12 (1.9)             | 9 (2.1)                  | 1.18 (0.48-2.87)                   | 0.90                        |
| Welding fumes (mg/m-3) |                                  |                      |                          |                                    |                             |
|                        | Unexposed to welding fumes [Ref] | 583 (90.1)           | 387 (90.0)               |                                    |                             |
|                        | Ever exposed to welding fumes    | 64 (9.9)             | 41 (9.7)                 | 0.92 (0.60-1.43)                   |                             |
|                        | Low (<40)                        | 45 (7.0)             | 30 (7.1)                 | 0.89 (0.54-1.48)                   |                             |
|                        | High (≥40)                       | 19 (2.9)             | 11 (2.6)                 | 1.01 (0.46-2.23)                   | 0.81                        |

<sup>a</sup> Models were conditioned on the region and birth year and adjusted for age at diagnosis/inclusion in addition to sibship size, being born from multiple pregnancies, and family history of TGCT

Two models are displayed one with binary exposure (ever exposed vs. unexposed) and one with the three levels of exposure (low and high vs. unexposed).

<sup>†</sup> *P* trend was obtained by treating the 3-category exposure variables as equally spaced ordinal variables in the regression models.

Cells may not sum up to totals due to missing values

**Supplementary Table S5:** Odds ratios (ORs) and 95% confidence intervals (95% CI) for TGCT associated with paternal occupational exposure to a low and high occupational exposure index of specific agents from sensitivity analysis excluding cases without confirmed pathology reports (n=43), TESTIS study, France

|                        |                                  | All controls (n=670) | All TGCT cases (n=411) * |                                    |                      |
|------------------------|----------------------------------|----------------------|--------------------------|------------------------------------|----------------------|
|                        |                                  | n (%)                | n (%)                    | adjusted ORs (95% CI) <sup>a</sup> | P trend <sup>†</sup> |
| Lead (μmol/l blood)    |                                  |                      |                          |                                    |                      |
|                        | Unexposed to lead [Ref]          |                      |                          |                                    |                      |
|                        | Ever exposed to lead             | 71 (11.0)            | 48 (12.4)                | 1.20 (0.79-1.81)                   |                      |
|                        | Low (< 18)                       | 45 (7.0)             | 36 (9.3)                 | 1.46 (0.90-2.37)                   |                      |
|                        | High (≥18)                       | 26 (4.0)             | 12 (3.1)                 | 0.75 (0.36-1.58)                   | 0.80                 |
| Chromium (μg/m-3)      |                                  |                      |                          |                                    |                      |
|                        | Unexposed to chromium [Ref]      | 579 (89.5)           | 359 (90.2)               |                                    |                      |
|                        | Ever exposed to chromium         | 68 (10.5)            | 38 (9.8)                 | 0.87 (0.56-1.36)                   |                      |
|                        | Low (87)                         | 49 (7.6)             | 26 (6.7)                 | 0.81 (0.47-1.38)                   |                      |
|                        | High (≥87)                       | 19 (2.9)             | 12 (3.1)                 | 1.03 (0.48-2.20)                   | 0.70                 |
| Iron (mg/m-3)          |                                  |                      |                          |                                    |                      |
|                        | Unexposed to iron [Ref]          | 575 (88.9)           | 351 (90.5)               |                                    |                      |
|                        | Ever exposed to iron             | 37 (9.5)             | 72 (11.1)                | 0.85 (0.55-1.32)                   |                      |
|                        | Low (<27.05)                     | 60 (9.3)             | 29 (7.5)                 | 0.78 (0.48-1.28)                   |                      |
|                        | High (≥27.05)                    | 12 (1.9)             | 8 (2.1)                  | 1.20 (0.48-3.03)                   | 0.68                 |
| Nickel (μg/m-3)        |                                  |                      |                          |                                    |                      |
|                        | Unexposed to nickel [Ref]        | 583 (90.1)           | 353 (91.0)               |                                    |                      |
|                        | Ever exposed to nickel           | 64 (9.9)             | 35 (9.0)                 | 0.90 (0.57-1.42)                   |                      |
|                        | Low (<67.48)                     | 52 (8.0)             | 25 (6.4)                 | 0.77 (0.46-1.31)                   |                      |
|                        | High (≥67.48)                    | 12 (1.9)             | 10 (2.6)                 | 1.43 (0.59-3.43)                   | 0.97                 |
| Welding fumes (mg/m-3) |                                  |                      |                          |                                    |                      |
|                        | Unexposed to welding fumes [Ref] | 583 (90.1)           | 353 (91.0)               |                                    |                      |
|                        | Ever exposed to welding fumes    | 64 (9.9)             | 35 (9.0)                 |                                    |                      |
|                        | Low (<40)                        | 45 (7.0)             | 25 (6.4)                 | 0.86 (0.50-1.47)                   |                      |
|                        | High (≥40)                       | 19 (3.0)             | 10 (2.6)                 | 1.00 (0.45-1.21)                   | 0.74                 |

<sup>a</sup> Models were conditioned on the region and birth year and adjusted for age at diagnosis/inclusion in addition to sibship size, being born from multiple pregnancies, family history of TGCT and family history of cryptorchidism

Two models are displayed one with binary exposure (ever exposed vs. unexposed) and one with the three levels of exposure (low and high vs. unexposed).

<sup>†</sup> P trend was obtained by treating the 3-category exposure variables as equally spaced ordinal variables in the regression models.

Cells may not sum up to totals due to missing values

**Supplementary Table S6:** Loadings and percentages of variance explained by PCA among fathers. TESTIS study, France.

|                 | <b>PC1</b> | <b>PC2</b> | <b>PC3</b> |
|-----------------|------------|------------|------------|
| Variability (%) | 53.19      | 21.19      | 19.11      |
| Iron            | 0.55       |            |            |
| Nickel          | 0.51       |            |            |
| Welding fumes   | 0.54       |            |            |
| Chromium        |            | 0.72       |            |
| Lead            |            |            | 0.96       |

The loadings in the table represent the weights of each original occupational exposure index (PxL) of heavy metals and welding fumes to the new principal component (PC1, PC2 and PC3) based on the exposure data of the controls. Only the loadings of the variables with significant contributions are shown for each PC. The first row represents the total variability explained by each principal component.

**Supplementary Table S7.** Odds ratios (ORs) and 95% confidence intervals (95% CI) of TGCT associated with paternal occupational exposure to a low and high occupational exposure index of specific agents, TESTIS study, France (N= 1124) with further adjustments for age at diagnosis/inclusion.

|                        |                                  | All controls (n=670) |            | All TGCT cases (n=454)             |                             |
|------------------------|----------------------------------|----------------------|------------|------------------------------------|-----------------------------|
|                        |                                  | n (%)                | n (%)      | adjusted ORs (95% CI) <sup>a</sup> | <i>P</i> trend <sup>†</sup> |
| Lead (μmol/l blood)    |                                  |                      |            |                                    |                             |
|                        | Unexposed to lead [Ref]          | 576 (89.0)           | 374 (87.0) |                                    |                             |
|                        | Ever exposed to lead             | 71 (11.0)            | 56 (13.0)  | 1.20 (0.80-1.80)                   |                             |
|                        | Low (<18)                        | 45 (7.0)             | 40 (9.3)   | 1.44 (0.91-2.27)                   |                             |
|                        | High (≥18)                       | 26 (4.0)             | 16 (3.7)   | 0.85 (0.44-1.64)                   | 0.87                        |
| Chromium (μg/m-3)      |                                  |                      |            |                                    |                             |
|                        | Unexposed to chromium [Ref]      | 579 (89.5)           | 385 (89.5) |                                    |                             |
|                        | Ever exposed to chromium         | 68 (10.5)            | 45 (10.5)  | 0.89 (0.57-1.38)                   |                             |
|                        | Low (87)                         | 49 (7.6)             | 32 (7.4)   | 0.82 (0.49-1.38)                   |                             |
|                        | High (≥87)                       | 19 (2.9)             | 13 (3.0)   | 1.07 (0.50-2.29)                   | 0.77                        |
| Iron (mg/m-3)          |                                  |                      |            |                                    |                             |
|                        | Unexposed to iron [Ref]          | 575 (89.9)           | 385 (89.5) |                                    |                             |
|                        | Ever exposed to iron             | 72 (11.1)            | 45 (10.5)  | 0.83 (0.54-1.29)                   |                             |
|                        | Low (<27.05)                     | 60 (9.3)             | 35 (8.1)   | 0.77 (0.47-1.25)                   |                             |
|                        | High (≥27.05)                    | 12 (1.9)             | 10 (2.3)   | 1.15 (0.45-2.94)                   | 0.60                        |
| Nickel (μg/m-3)        |                                  |                      |            |                                    |                             |
|                        | Unexposed to nickel [Ref]        | 583 (90.1)           | 388 (90.2) |                                    |                             |
|                        | Ever exposed to nickel           | 64 (9.9)             | 42 (9.8)   | 0.88 (0.56-1.38)                   |                             |
|                        | Low (<67.48)                     | 52 (8.0)             | 32 (7.4)   | 0.76 (0.45-1.27)                   |                             |
|                        | High (≥67.48)                    | 12 (1.9)             | 10 (2.3)   | 1.40 (0.58-3.37)                   | 0.90                        |
| Welding fumes (mg/m-3) |                                  |                      |            |                                    |                             |
|                        | Unexposed to welding fumes [Ref] | 583 (90.1)           | 387 (90.0) |                                    |                             |
|                        | Ever exposed to welding fumes    | 64 (9.9)             | 43 (10.0)  | 0.88 (0.56-1.38)                   |                             |
|                        | Low (<40)                        | 45 (7.0)             | 31 (7.2)   | 0.84 (0.49-1.43)                   |                             |
|                        | High (≥40)                       | 19 (2.9)             | 12 (2.8)   | 0.97 (0.43-2.15)                   | 0.66                        |

<sup>a</sup> Models were conditioned on the region and birth year and adjusted for age at diagnosis/inclusion in addition to sibship size, being born from multiple pregnancies, personal history of testicular trauma, family history of TGCT, and family history of cryptorchidism.

Two models are displayed one with binary exposure (ever exposed vs. unexposed) and one with the three levels of exposure (low and high vs. unexposed).

<sup>†</sup> *P* trend was obtained by treating the 3-category exposure variables as equally spaced ordinal variables in the regression models.

Cells may not sum up to totals due to missing values

**Supplementary Table S8.** Odds ratios (ORs) and 95% confidence intervals (95% CIs) of TGCT associated with paternal occupational exposure (3 categories), TESTIS study, France (N= 1124) with further adjustments for age at diagnosis/inclusion.

|                   |                                                | <b>All controls (n=670)</b> | <b>All TGCT cases (n=454)</b> |                  |
|-------------------|------------------------------------------------|-----------------------------|-------------------------------|------------------|
|                   |                                                | n (%)                       | n (%)                         | aOR (95% CI) a   |
| Paternal exposure |                                                |                             |                               |                  |
| Lead              |                                                |                             |                               |                  |
|                   | Unexposed to heavy metals/ welding fumes [Ref] | 548 (84.7)                  | 363 (84.4)                    |                  |
|                   | At least lead                                  | 71 (11.0)                   | 56 (13.0)                     | 1.16 (0.77-1.74) |
|                   | Metals but not lead                            | 28 (4.3)                    | 11 (2.6)                      | 0.46 (0.20-1.05) |
| Chromium          |                                                |                             |                               |                  |
|                   | Unexposed to heavy metals/ welding fumes [Ref] | 548 (84.7)                  | 363 (84.4)                    |                  |
|                   | At least chromium                              | 68 (10.5)                   | 45 (10.5)                     | 0.89 (0.57-1.39) |
|                   | Metals but not chromium                        | 31 (4.8)                    | 22 (5.1)                      | 1.10 (0.60-2.01) |
| Welding fumes     |                                                |                             |                               |                  |
|                   | Unexposed to heavy metals/WF [Ref]             | 548 (84.7)                  | 363 (84.4)                    |                  |
|                   | At least welding fumes                         | 64 (9.9)                    | 43 (10.0)                     | 0.88 (0.56-1.39) |
|                   | Metals but not welding fumes                   | 35 (5.4)                    | 24 (5.6)                      | 1.09 (0.62-1.93) |
| Iron              |                                                |                             |                               |                  |
|                   | Unexposed to heavy metals/ welding fumes [Ref] | 548 (84.7)                  | 363 (84.4)                    |                  |
|                   | At least iron                                  | 72 (11.1)                   | 45 (10.5)                     | 0.84 (0.54-2.32) |
|                   | Metals but not iron                            | 27 (4.2)                    | 22 (5.1)                      | 1.25 (0.68-2.32) |
| Nickel            |                                                |                             |                               |                  |
|                   | Unexposed to heavy metals/ welding fumes [Ref] | 548 (84.7)                  | 363 (84.4)                    |                  |
|                   | At least nickel                                | 64 (9.9)                    | 42 (9.8)                      | 0.88 (0.56-1.39) |
|                   | Metals but not nickel                          | 35 (5.4)                    | 25 (5.8)                      | 1.09 (0.62-1.93) |

<sup>a</sup> Models were conditioned on the region and adjusted for age at diagnosis/inclusion in addition to sibship size, being born from multiple pregnancies, personal history of testicular trauma, family history of cryptorchidism. aOR: adjusted Odds Ratios  
Cells may not sum up to totals due to missing values

**Supplementary Table S9.** Odds ratios (ORs) † and 95% confidence intervals (95% CIs) of TGCT using principal component analysis of metals and welding fumes, TESTIS study, France (N= 1124) with further adjustments for age at diagnosis/inclusion.

|                                        | aOR (95% CI) † <sup>a</sup> |
|----------------------------------------|-----------------------------|
| Component                              |                             |
| Component 1: composed of Ni, Fe & Weld | 1.00 (0.92-1.08)            |
| Component 2: composed of Cr            | 0.99 (0.87-1.13)            |
| Component 3: composed of Pb            | 0.94 (0.81-1.09)            |

a Models were conditioned on the region and adjusted for age at diagnosis/inclusion in addition to sibship size, being born from multiple pregnancies, personal history of testicular trauma, family history of TGCT, and family history of cryptorchidism.

aOR : adjusted Odds Ratios

† ORs are expressed for a one-unit increase in the score of each component
